# Supplementary material
Source: publisher figshare collection journal article supplement (https://acs.figshare.com/ndownloader/files/7030688)
Supplement: Supplementary file 1 [file 7030688]

Supporting Information

## **Few-layered Graphene-like Boron Nitride: A Highly Efficient Adsorbent for Indoor Formaldehyde Removal**

Jiawei Ye<sup>§</sup>, Xiaofeng Zhu<sup>§</sup>, Bei Cheng, Jiaguo Yu\* and Chuanjia Jiang\*

State Key Laboratory of Advanced Technology for Materials Synthesis and Processing,  
Wuhan University of Technology, Luoshi Road 122, Wuhan 430070, P. R. China

<sup>§</sup>These authors contributed equally to this work.

\*Corresponding authors.

Tel.: 0086-27-87871029, Fax: 0086-27-87879468, E-mail: [jiaguoyu@yahoo.com](mailto:jiaguoyu@yahoo.com);  
[jiangcj2016@yahoo.com](mailto:jiangcj2016@yahoo.com)

Total number of pages: 12.

This Supporting Information provides:

1. Materials characterization methods.
2. Procedures of HCHO adsorption experiments.
3. Modeling of HCHO adsorption kinetics and isotherms
4. Three tables and 10 figures.

**Characterization.** The phase structures of p-BN and c-BN were analysed by X-ray diffraction (XRD) (Rigaku D/Max-RB, Japan) with Cu K $\alpha$  radiation at a scan rate ( $2\theta$ ) of 0.05  $^\circ$ /s. The morphology of p-BN was observed by a field-emission scanning electron microscope (FESEM) (JEOL 7500F, Japan) at an accelerating voltage of 15 kV. Transmission electron microscopy (TEM) and high-resolution TEM (HRTEM) images were collected on a JEM-2100F microscope at an accelerating voltage of 200 kV. X-ray photoelectron spectra (XPS) measurements were carried out on VG ESCALAB210 with Mg K $\alpha$  source. All binding energies were referenced to the C 1s peak at 284.8 eV of surface adventitious carbon. Fourier transform infrared (FTIR) spectra were collected using a Shimadzu IRAffinity-1 FTIR spectrometer in the range of 500–4000  $\text{cm}^{-1}$ .

The Brunauer-Emmett-Teller (BET) specific surface area ( $S_{\text{BET}}$ ) of the samples was determined by a multipoint method using N $_2$  adsorption data in the relative pressure ( $P/P_0$ ) range of 0.05–0.3 (Micromeritics ASAP 2020, USA). Prior to N $_2$  adsorption measurements, all samples were degassed at 180  $^\circ\text{C}$ . The pore size distributions were determined by the N $_2$  adsorption volume via the Barret-Joyner-Halender (BJH) method assuming a cylindrical pore model. The pore volume and the average pore size were estimated from the N $_2$  adsorption volume at  $P/P_0$  of 0.994.

In situ diffuse reflectance infrared Fourier transform spectroscopy (DRIFTS) was performed on Thermo Fisher Nicolet iS50 FTIR Spectrometer. Prior to the DRIFTS tests, the adsorbent was purged with pure oxygen (O $_2$ ) gas for 120 min. Then a gas

mixture of HCHO + O<sub>2</sub> was introduced into the DRIFTS cell at room temperature and a flow rate of 30 mL/min. All spectra were recorded with a resolution of 4 cm<sup>-1</sup>, and the background spectrum was subtracted from each spectrum.

**HCHO adsorption test.** HCHO adsorption experiments of the tested materials were performed in the dark and at 25 °C in a 6-L organic glass box reactor covered with aluminium foil on its inner walls. The adsorbent (50 mg) was dispersed on the bottom of a glass Petri dish (10 cm diameter), which was subsequently placed in the reactor and covered with a glass slide. Then 6 µL of concentrated HCHO solution (38 wt%) was injected into the reactor, and a 5 W fan near the bottom of reactor was turned on to accelerate the volatilization of HCHO. After 2 h, the HCHO solution was completely volatilized and the concentration of HCHO stabilized at 151±3 parts per million (ppm). The HCHO adsorption experiment was started by removing the glass slide cover, and the real-time concentrations of HCHO, carbon dioxide (CO<sub>2</sub>), carbon monoxide (CO) and water vapor were online detected by a Photoacoustic Field Gas Monitor (INNOVA AirTech Instruments, Model 1412). In the recycle experiments to test the performance stability, the adsorbents were heated by an infrared lamp for 30 min before subsequent HCHO adsorption tests. For measuring the adsorption isotherms of the p-BN and c-BN samples, initial HCHO concentrations ranged from 20 to 646 ppm.

The amount of HCHO adsorption,  $q_t$  (mg/g), at time  $t$  was calculated using equation (1):

$$q_t = \frac{(C_0 - C_t)V}{W} \quad (1)$$

where  $C_0$  and  $C_t$  (mg/L) are the initial HCHO concentration and HCHO concentration at time  $t$ , respectively,  $V$  is the total volume of air in the reactor ( $V = 6$  L), and  $W$  is the mass of the adsorbent ( $W = 0.050$  g).

The equilibrium adsorption capacity of the samples,  $q_e$ , was calculated using equation (2):

$$q_e = \frac{(C_0 - C_e)V}{W} \quad (2)$$

where ( $C_e$ , in mg/L) is HCHO concentration measured at equilibrium (i.e., when the change in  $C_t$  was less than 0.5%).

**Modeling of HCHO adsorption kinetics and isotherms.** The adsorption kinetics of HCHO on the p-BN samples were fitted using pseudo-first-order and pseudo-second-order kinetic models. The linearized forms of the pseudo-first-order and pseudo-second-order kinetics equations are expressed as follows<sup>1</sup>:

$$\text{Pseudo-first-order: } \ln(q_e - q_t) = \ln q_e - k_1 t \quad (3)$$

$$\text{Pseudo-second-order: } \frac{t}{q_t} = \frac{1}{k_2 q_e^2} + \frac{1}{q_e} t \quad (4)$$

where  $k_1$  (1/min) and  $k_2$  (g/mg/min) are the rate constants of pseudo-first-order and pseudo-second-order adsorption, respectively, and  $q_e$  is the calculated equilibrium adsorption capacity.

The adsorption isotherms of HCHO on the p-BN and c-BN samples were fitted to the Langmuir and Freundlich isotherm models, using the linearized equations<sup>1</sup>:

$$\text{Langmuir: } \frac{C_e}{q_e} = \frac{1}{q_m} C_e + \frac{1}{q_m K_L} \quad (5)$$

$$\text{Freundlich: } \ln q_e = \frac{1}{n} \ln C_e + \ln K_F \quad (6)$$

where  $K_L$  is the Langmuir constant (L/mg), and  $q_m$  is the maximum adsorption capacity of the adsorbent (mg/g), while  $K_F$  and  $n$  are Freundlich constants related to the adsorption capacity and adsorption intensity, respectively.

**Table S1.** Sources of commercial materials.

| Sample                                   | Manufacturer                         |
|------------------------------------------|--------------------------------------|
| c-BN                                     | Aladdin Industrial Corporation       |
| AC                                       | Tianjin kwangfu Technology Co., Ltd. |
| TiO <sub>2</sub> (P25)                   | Degussa AG                           |
| $\gamma$ -Al <sub>2</sub> O <sub>3</sub> | Aladdin Industrial Corporation       |
| SiO <sub>2</sub>                         | Aladdin Industrial Corporation       |
| $\alpha$ -Fe <sub>2</sub> O <sub>3</sub> | Aladdin Industrial Corporation       |
| CeO <sub>2</sub>                         | Aladdin Industrial Corporation       |
| Molecular Sieve (13X)                    | Sinopharm Chemical Reagent Co., Ltd  |
| Co <sub>2</sub> O <sub>3</sub>           | Shantou Guanghua Chemical Plant      |

**Table S2.** Kinetic parameters for HCHO adsorption by p-BN sample.

| $q_{e,exp}$<br>(mg/g) | pseudo-first-order |                       |        | pseudo-second-order |                       |        |
|-----------------------|--------------------|-----------------------|--------|---------------------|-----------------------|--------|
|                       | $k_1$<br>(1/min)   | $q_{e,cal}$<br>(mg/g) | $R^2$  | $k_2$<br>(g/mg/min) | $q_{e,cal}$<br>(mg/g) | $R^2$  |
| 19.06                 | 0.0995             | 9.38                  | 0.9706 | 0.0228              | 19.84                 | 0.9997 |

**Table S3.** In situ DRIFTS band assignments of adsorbed species on p-BN within the wavenumber range of 3000–1300 cm<sup>-1</sup>. <sup>a</sup>

| Species      | Wavenumber (cm <sup>-1</sup> ) | Assignment <sup>b</sup>                       | Literature value (cm <sup>-1</sup> )                                       |
|--------------|--------------------------------|-----------------------------------------------|----------------------------------------------------------------------------|
| Formate      | 2986                           | $\nu_{as}(\text{COO}) + \delta(\text{CH})$    | 2991, <sup>2</sup> 2980, <sup>3</sup> 2956, <sup>4</sup> 2955 <sup>5</sup> |
|              | 2863                           | $\nu(\text{CH})$                              | 2868, <sup>4</sup> 2865, <sup>6</sup> 2864 <sup>7</sup>                    |
|              | 2750                           | $\nu(\text{CH})$                              | 2740 <sup>4</sup>                                                          |
|              | 1610                           | $\nu_{as}(\text{COO})_{(\text{monodentate})}$ | 1612, <sup>8</sup> 1614 <sup>9</sup>                                       |
|              | 1566                           | $\nu_{as}(\text{COO})_{(\text{bidentate})}$   | 1570, <sup>4</sup> 1569 <sup>10</sup>                                      |
|              | 1371                           | $\delta(\text{CH})$                           | 1380, <sup>10</sup> 1371 <sup>7</sup>                                      |
| Methoxy      | 2912                           | $\nu_{as}(\text{CH}_3)$                       | 2926 <sup>5</sup>                                                          |
|              | 2804                           | $\nu_s(\text{CH}_3)$                          | 2820 <sup>5</sup>                                                          |
|              | 1467                           | $\nu(\text{CH})$                              | 1460 <sup>5</sup>                                                          |
| Formaldehyde | 1771, 1700                     | $\nu(\text{C=O})$                             | 1770, 1715 <sup>3</sup>                                                    |
|              | 1413                           | N/A <sup>c</sup>                              | 1413 <sup>11</sup>                                                         |

Notes: <sup>a</sup> Broad bands at 3200–3600 cm<sup>-1</sup> due to the stretching vibration of hydroxyl groups<sup>9</sup> are not included. <sup>b</sup> The symbols represent different vibration modes:  $\delta$ , bending vibration;  $\nu$ , stretching vibration;  $\nu_{as}$ , asymmetric stretching vibration;  $\nu_s$ , symmetric stretching vibration. <sup>c</sup> Band assignment not available from the literature.

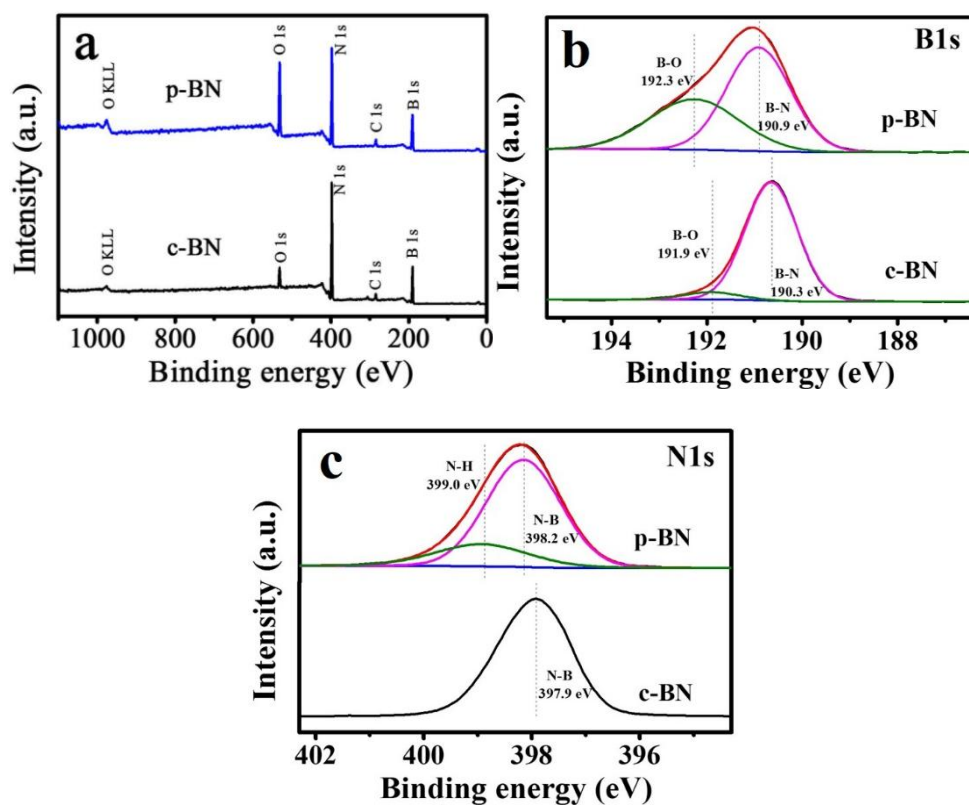

**Figure S1.** XPS survey spectra (a), high-resolution B 1s spectra (b) and N 1s spectra (c) of p-BN and c-BN samples.

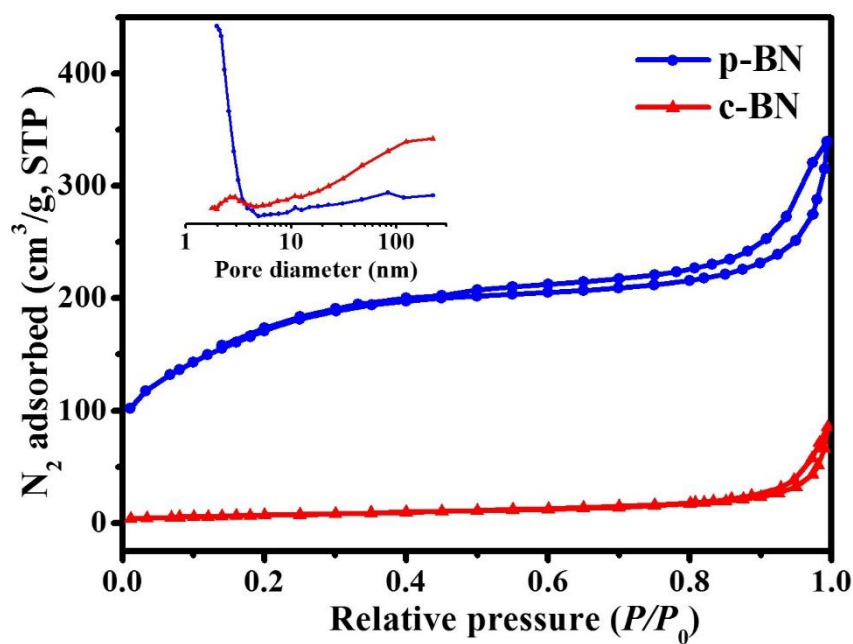

**Figure S2.** N<sub>2</sub> adsorption-desorption isotherms and the corresponding pore size distributions (inset) of the p-BN and c-BN samples.

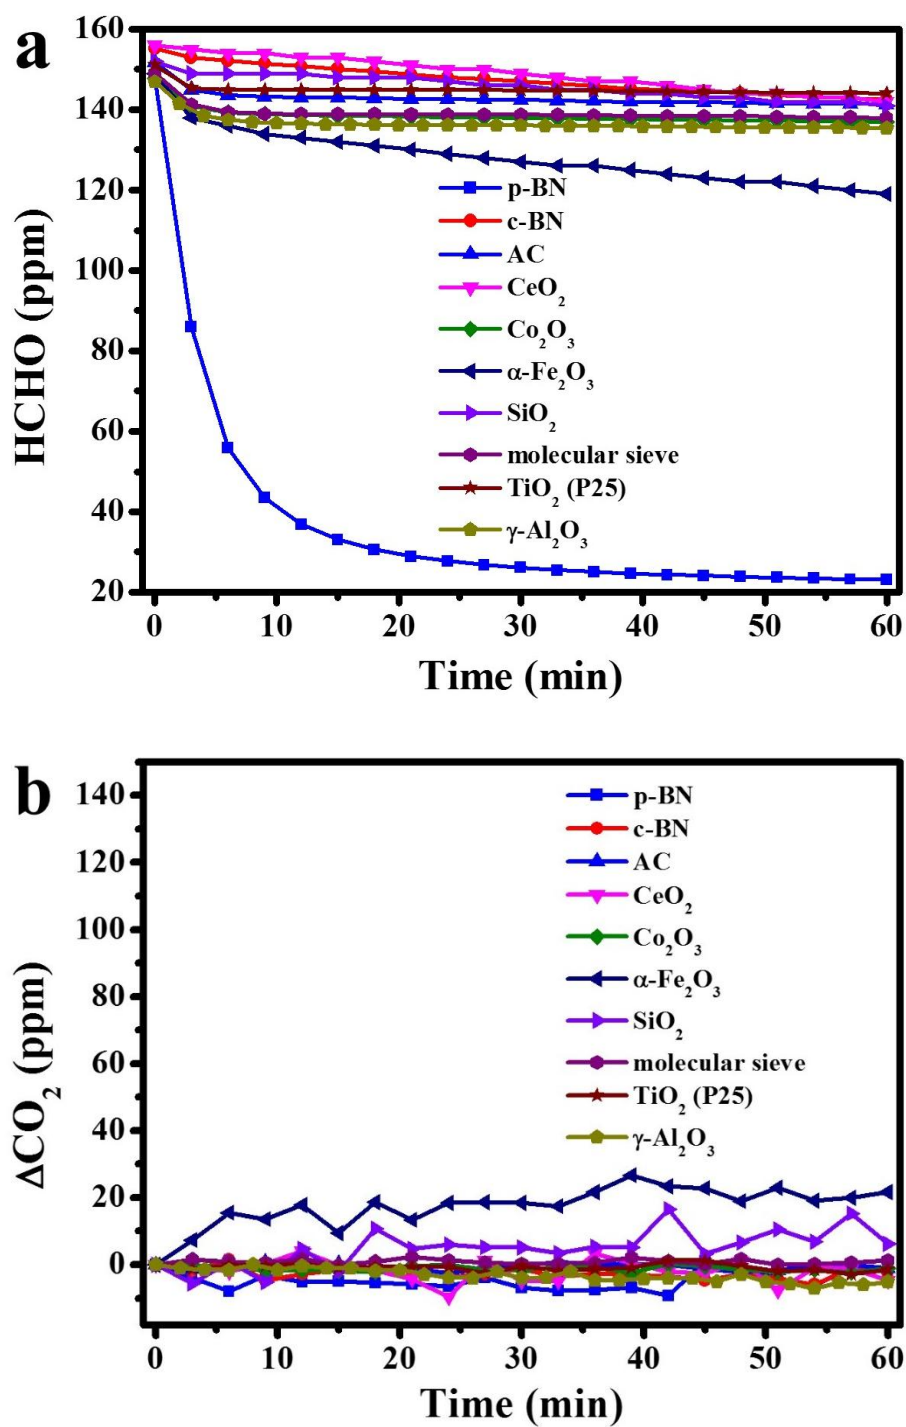

**Figure S3.** Changes of HCHO concentration (a) and  $\Delta\text{CO}_2$  ( $\text{CO}_2$  concentration change relative to background level) (b) over time in the presence of p-BN and the commercial materials.



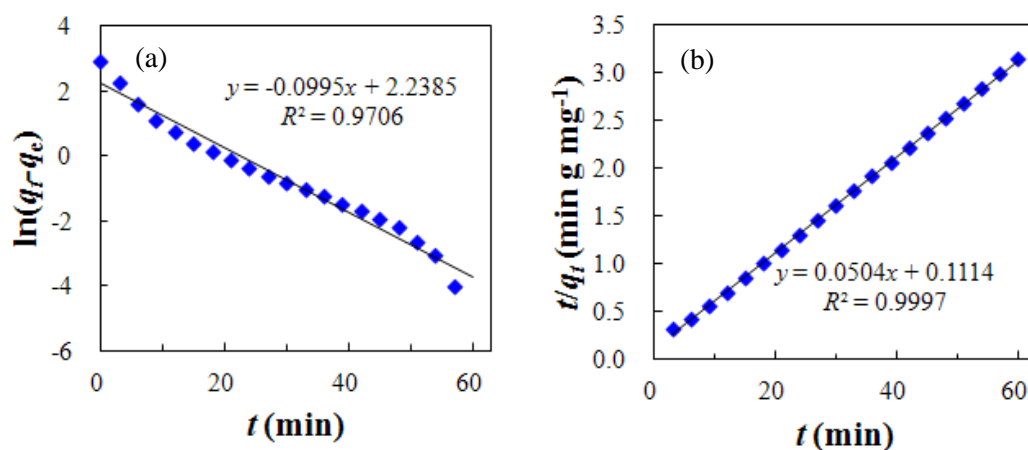

**Figure S4.** Modeling of HCHO adsorption kinetics by the p-BN sample using (a) pseudo-first-order and (b) pseudo-second-order kinetic models.

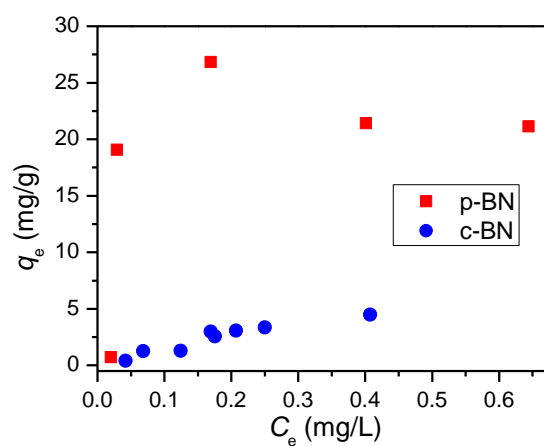

**Figure S5.** HCHO adsorption isotherms by p-BN and c-BN samples at room temperature.

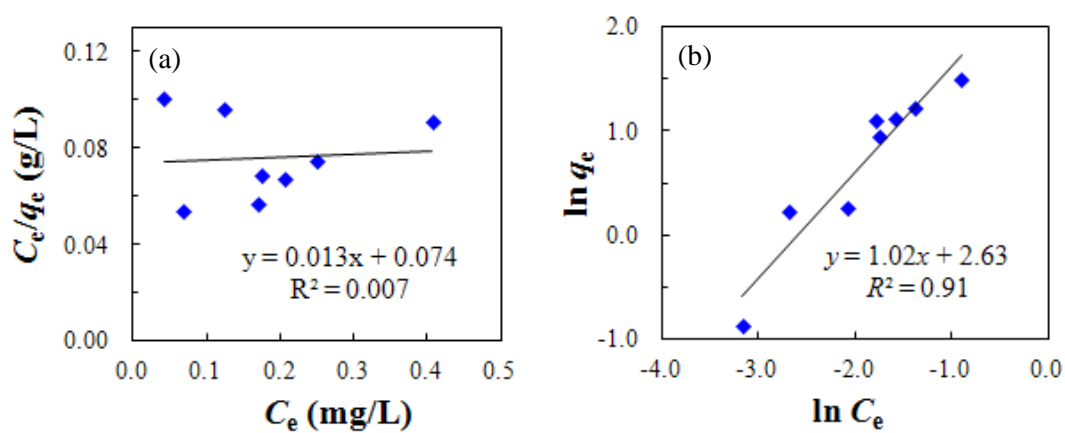

**Figure S6.** Data fitting of HCHO adsorption isotherm by c-BN using (a) Langmuir and (b) Freundlich isotherm models.

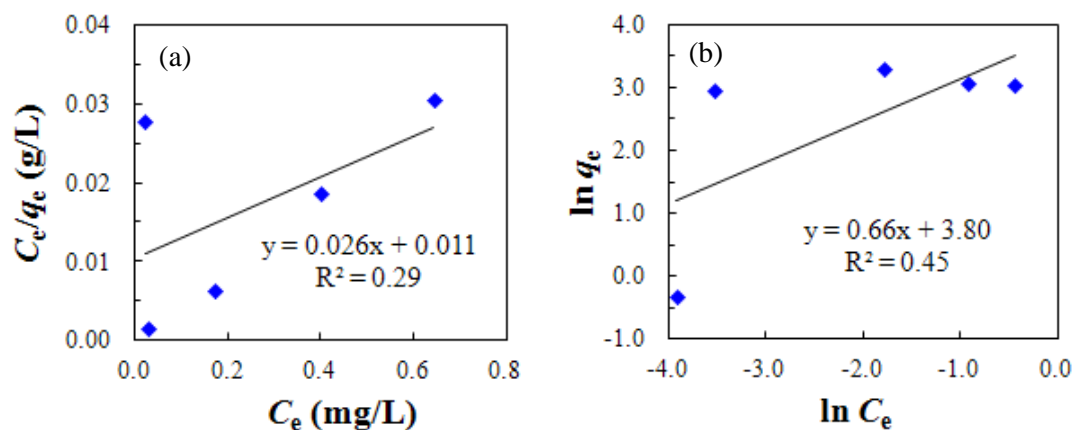

**Figure S7.** Data fitting of HCHO adsorption isotherm by p-BN using (a) Langmuir and (b) Freundlich isotherm models.

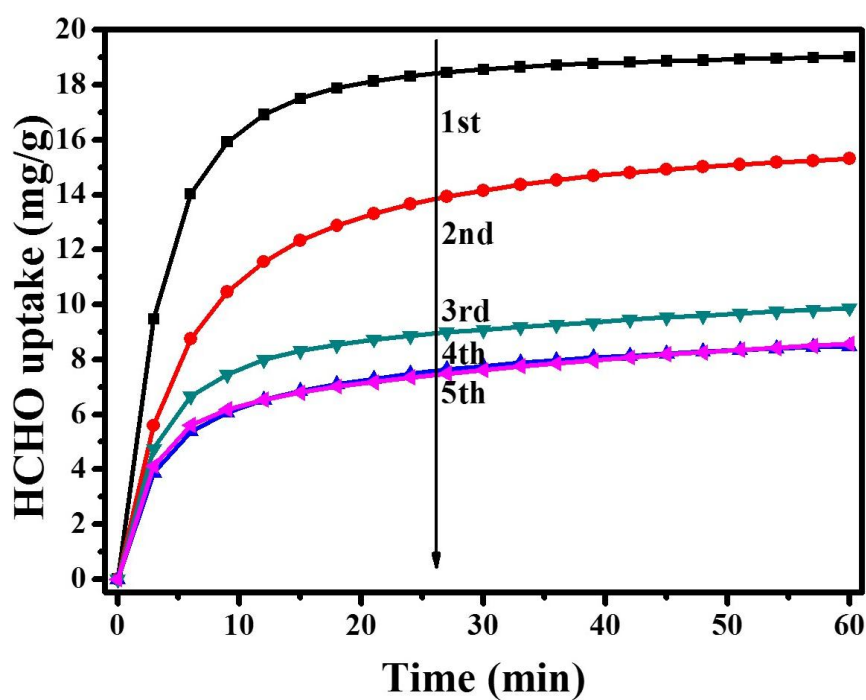

**Figure S8.** HCHO uptake as a function of time for the p-BN sample in recycling tests.

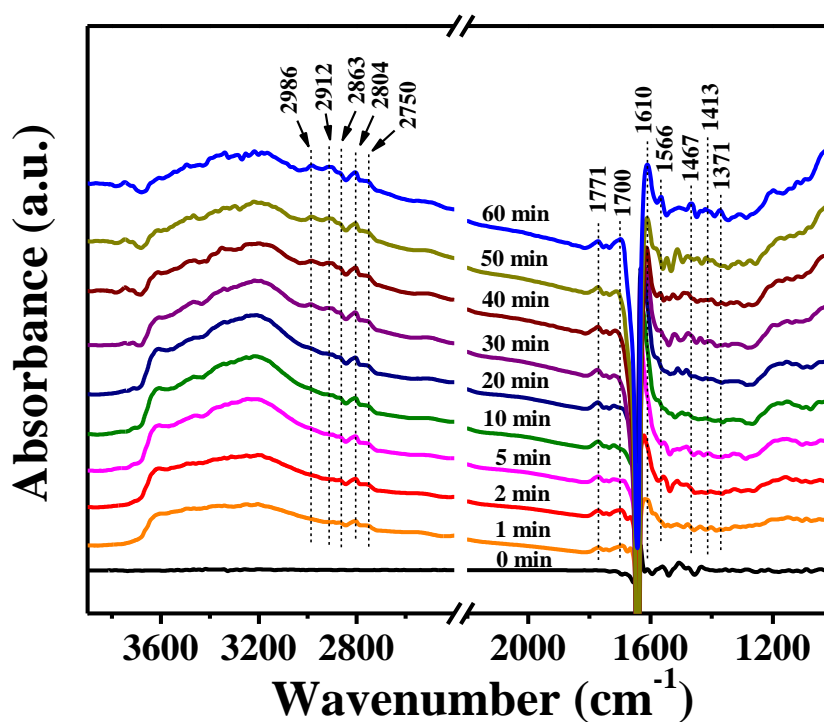

**Figure S9.** In situ DRIFTS spectra of p-BN adsorbent as a function of time under a flow of HCHO/O<sub>2</sub> at ambient temperature.

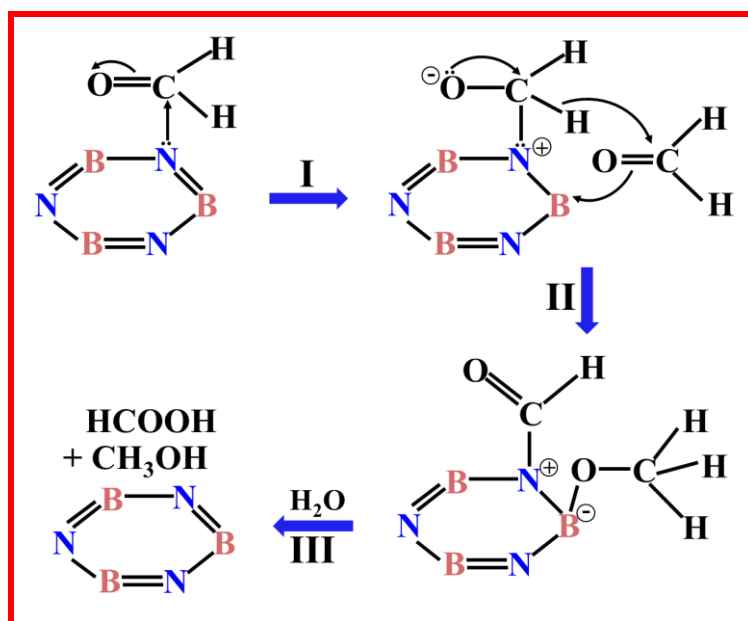

**Figure S10.** Proposed disproportionation reaction mechanism for HCHO over the surface of p-BN.

## References

1. Xu, J.; Wang, L.; Zhu, Y. F., Decontamination of bisphenol A from aqueous solution by graphene adsorption. *Langmuir* **2012**, *28*, 8418-8425.
2. Collins, S. E.; Baltanas, M. A.; Bonivardi, A. L., An infrared study of the intermediates of methanol synthesis from carbon dioxide over Pd/beta-Ga<sub>2</sub>O<sub>3</sub>. *J. Catal.* **2004**, *226*, 410-421.
3. Chen, D.; Qu, Z. P.; Sun, Y. H.; Gao, K.; Wang, Y., Identification of reaction intermediates and mechanism responsible for highly active HCHO oxidation on Ag/MCM-41 catalysts. *Appl. Catal. B-Environ.* **2013**, *142*, 838-848.
4. Zhang, C. B.; He, H.; Tanaka, K., Catalytic performance and mechanism of a Pt/TiO<sub>2</sub> catalyst for the oxidation of formaldehyde at room temperature. *Appl. Catal. B* **2006**, *65*, 37-43.
5. Kattel, S.; Yan, B. H.; Yang, Y. X.; Chen, J. G. G.; Liu, P., Optimizing binding energies of key intermediates for CO<sub>2</sub> hydrogenation to methanol over oxide-supported copper. *J. Am. Chem. Soc.* **2016**, *138*, 12440-12450.
6. Qi, L. F.; Cheng, B.; Yu, J. G.; Ho, W. K., High-surface area mesoporous Pt/TiO<sub>2</sub> hollow chains for efficient formaldehyde decomposition at ambient temperature. *J. Hazard. Mater.* **2016**, *301*, 522-530.
7. Quiroz, J.; Giraudon, J. M.; Gervasini, A.; Dujardin, C.; Lancelot, C.; Trentesaux, M.; Lamonier, J. F., Total oxidation of formaldehyde over MnO<sub>x</sub>-CeO<sub>2</sub> catalysts: The effect of acid treatment. *ACS Catal.* **2015**, *5*, 2260-2269.
8. Yan, Z. X.; Xu, Z. H.; Yu, J. G.; Jaroniec, M., Highly active mesoporous ferrihydrite supported Pt catalyst for formaldehyde removal at room temperature. *Environ. Sci. Technol.* **2015**, *49*, 6637-6644.
9. Ma, Y.; Zhang, G. K., Sepiolite nanofiber-supported platinum nanoparticle catalysts toward the catalytic oxidation of formaldehyde at ambient temperature: Efficient and stable performance and mechanism. *Chem. Eng. J.* **2016**, *288*, 70-78.
10. Wang, J. L.; Zhang, P. Y.; Li, J. G.; Jiang, C. J.; Yunus, R.; Kim, J., Room-temperature oxidation of formaldehyde by layered manganese oxide: Effect of water. *Environ. Sci. Technol.* **2015**, *49*, 12372-12379.
11. Sun, S.; Ding, J. J.; Bao, J.; Gao, C.; Qi, Z. M.; Li, C. X., Photocatalytic oxidation of gaseous formaldehyde on TiO<sub>2</sub>: An in situ DRIFTS study. *Catal. Lett.* **2010**, *137*, 239-246.
